# Supplementary material for: Conformational control of ligands to create a finite metal–organic cluster and an extended metal–organic framework
Source: Royal Society of Chemistry journal article supplement (doi:10.1039/c2ce26015h), 2012-10-04
Supplement: c2ce26015h.pdf [file c2ce26015h.pdf]

## Supporting Information

### **Conformational Control of Ligands to Create a Finite Metal–Organic Cluster and an Extended Metal–Organic Framework**

Lalit Rajput,<sup>a</sup> Dongwook Kim,<sup>a</sup> and Myoung Soo Lah\*<sup>a</sup>

<sup>a</sup> Interdisciplinary School of Green Energy, Ulsan National Institute of Science & Technology, Ulsan, Korea.

**Table S1.** Crystal data and structure refinement for **1**.

|                                       |                                                                    |                     |
|---------------------------------------|--------------------------------------------------------------------|---------------------|
| Empirical formula                     | $\text{C}_{60}\text{H}_{42}\text{N}_6\text{O}_{21}\text{Cu}_3$     |                     |
| Formula weight                        | 1373.66                                                            |                     |
| Temperature                           | 173(2) K                                                           |                     |
| Wavelength                            | 0.71073 Å                                                          |                     |
| Crystal system                        | Cubic                                                              |                     |
| Space group                           | $Pn\bar{3}n$                                                       |                     |
| Unit cell dimensions                  | $a = 32.365(4)$ Å                                                  | $\alpha = 90^\circ$ |
|                                       | $b = 32.365(4)$ Å                                                  | $\beta = 90^\circ$  |
|                                       | $c = 32.365(4)$ Å                                                  | $\gamma = 90^\circ$ |
| Volume                                | $33902(7)$ Å <sup>3</sup>                                          |                     |
| Z                                     | 8                                                                  |                     |
| Density (calculated)                  | $0.538$ Mg/m <sup>3</sup>                                          |                     |
| Absorption coefficient                | $0.402$ mm <sup>-1</sup>                                           |                     |
| F(000)                                | 5592                                                               |                     |
| Crystal size                          | $0.50 \times 0.49 \times 0.43$ mm <sup>3</sup>                     |                     |
| Theta range for data collection       | $2.88$ to $23.33^\circ$                                            |                     |
| Index ranges                          | $-35 \leq h \leq 34$ , $-35 \leq k \leq 30$ , $-32 \leq l \leq 32$ |                     |
| Reflections collected                 | 108634                                                             |                     |
| Independent reflections               | 4057 [R(int) = 0.2337]                                             |                     |
| Completeness to theta = $23.33^\circ$ | 98.3 %                                                             |                     |
| Absorption correction                 | Semi-empirical from equivalents                                    |                     |
| Max. and min. transmission            | 0.8460 and 0.8241                                                  |                     |
| Refinement method                     | Full-matrix least-squares on F <sup>2</sup>                        |                     |
| Data / restraints / parameters        | 4057 / 82 / 119                                                    |                     |
| Goodness-of-fit on F <sup>2</sup>     | 1.341                                                              |                     |
| Final R indices [I > 2sigma(I)]       | R1 = 0.1515, wR2 = 0.4379                                          |                     |
| R indices (all data)                  | R1 = 0.2465, wR2 = 0.4844                                          |                     |
| Largest diff. peak and hole           | $0.619$ and $-0.335$ e·Å <sup>-3</sup>                             |                     |

**Table S2.** Crystal data and structure refinement for **2**.

|                                        |                                                                        |                           |
|----------------------------------------|------------------------------------------------------------------------|---------------------------|
| Empirical formula                      | $\text{C}_{278}\text{H}_{340}\text{N}_{44}\text{O}_{94}\text{Ni}_{14}$ |                           |
| Formula weight                         | 6623.88                                                                |                           |
| Temperature                            | 96(2) K                                                                |                           |
| Wavelength                             | 0.80000 Å                                                              |                           |
| Crystal system                         | Monoclinic                                                             |                           |
| Space group                            | C2/c                                                                   |                           |
| Unit cell dimensions                   | $a = 41.121(8)$ Å                                                      | $\alpha = 90^\circ$       |
|                                        | $b = 20.457(4)$ Å                                                      | $\beta = 106.71(3)^\circ$ |
|                                        | $c = 39.436(8)$ Å                                                      | $\gamma = 90^\circ$       |
| Volume                                 | $31773(11)$ Å <sup>3</sup>                                             |                           |
| Z                                      | 4                                                                      |                           |
| Density (calculated)                   | $1.385$ Mg/m <sup>3</sup>                                              |                           |
| Absorption coefficient                 | $1.179$ mm <sup>-1</sup>                                               |                           |
| F(000)                                 | 13840                                                                  |                           |
| Crystal size                           | $0.50 \times 0.50 \times 0.33$ mm <sup>3</sup>                         |                           |
| Theta range for data collection        | $1.63$ to $28.00^\circ$                                                |                           |
| Index ranges                           | $-48 \leq h \leq 48$ , $-23 \leq k \leq 23$ , $-46 \leq l \leq 46$     |                           |
| Reflections collected                  | 93568                                                                  |                           |
| Independent reflections                | 26217 [R(int) = 0.0407]                                                |                           |
| Completeness to $\theta = 28.00^\circ$ | 97.5 %                                                                 |                           |
| Absorption correction                  | Semi-empirical from equivalents                                        |                           |
| Max. and min. transmission             | 0.6969 and 0.5901                                                      |                           |
| Refinement method                      | Full-matrix-block least-squares on $F^2$                               |                           |
| Data / restraints / parameters         | 26217 / 177 / 2303                                                     |                           |
| Goodness-of-fit on $F^2$               | 1.085                                                                  |                           |
| Final R indices [ $I > 2\sigma(I)$ ]   | $R1 = 0.0643$ , $wR2 = 0.1933$                                         |                           |
| R indices (all data)                   | $R1 = 0.0803$ , $wR2 = 0.2031$                                         |                           |
| Largest diff. peak and hole            | $0.668$ and $-0.425$ e·Å <sup>-3</sup>                                 |                           |

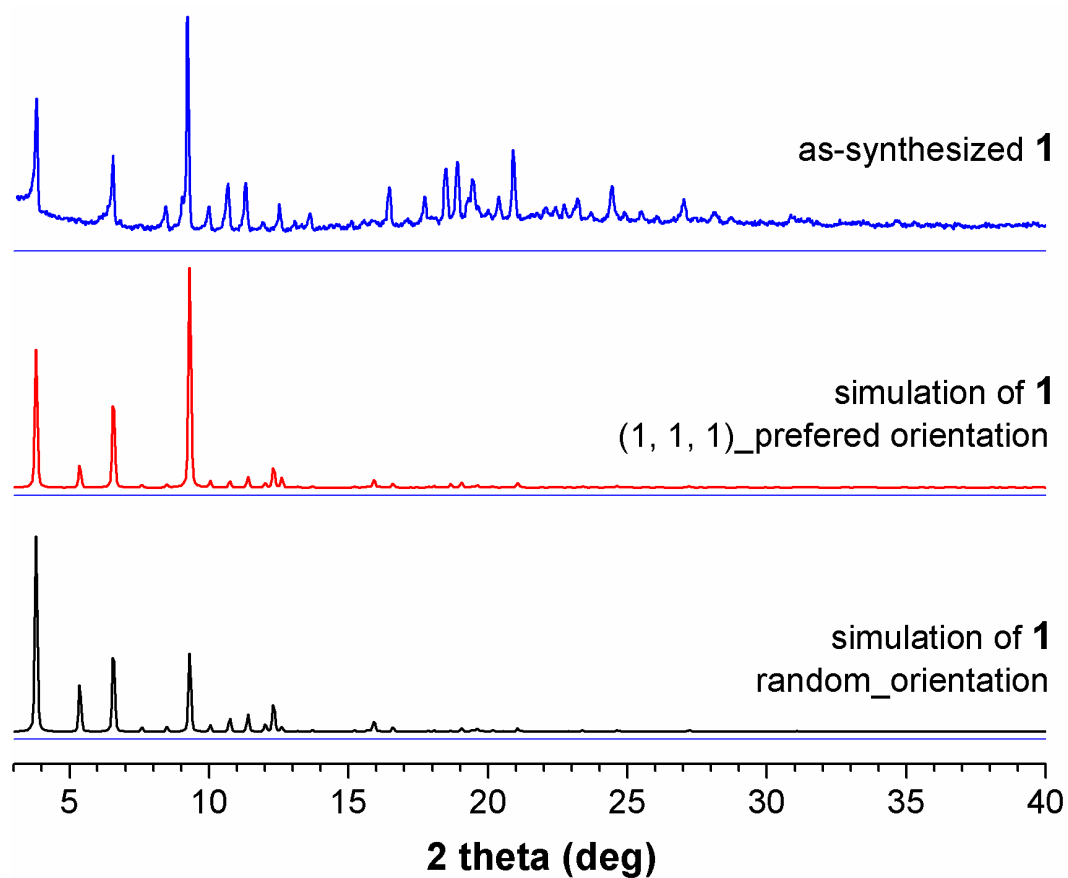

**Fig. S1** PXRD patterns of **1**. (a) A simulated PXRD pattern from the single crystal structure of **1**, (b) from the single crystal structure of **1** with [1, 1, 1] preferred orientation, and (c) a PXRD pattern of the as-synthesized sample.

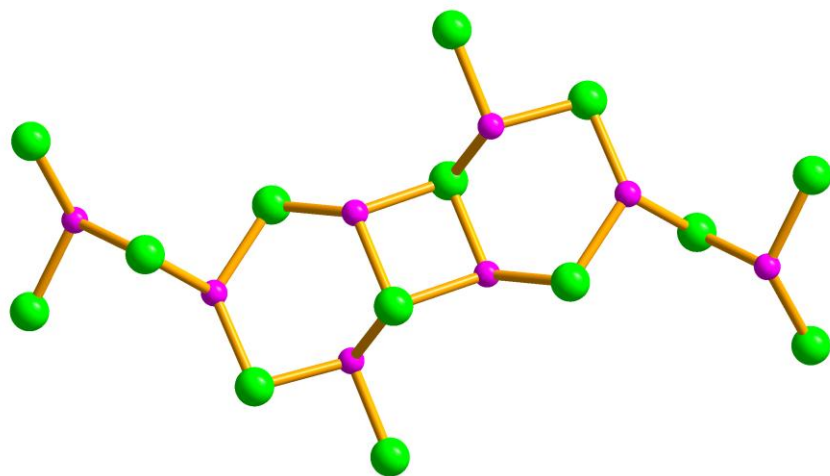

**Fig. S2** The 14 Ni(II) ions of **2** in a crystallographic inversion center are bridged *via* eight  $\mu^3$ -hydroxo oxygen atoms (shown in pink).

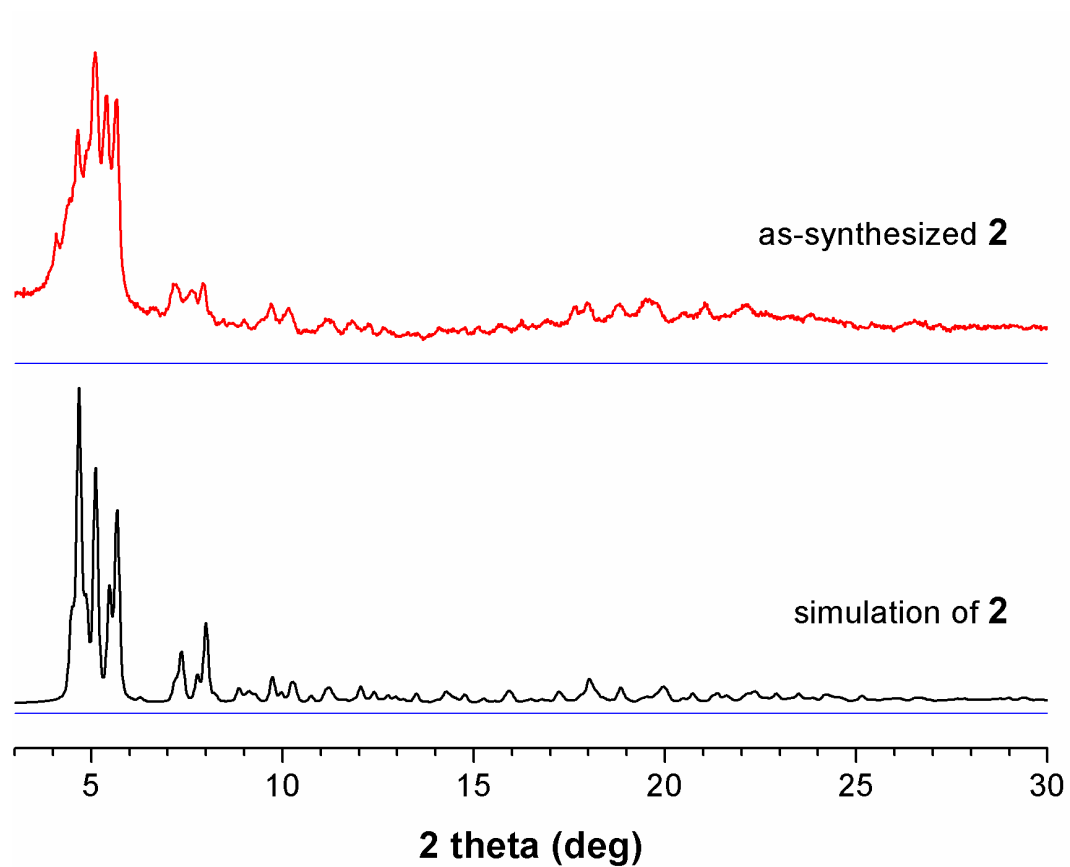

**Fig. S3** PXRD patterns of **2**. (a) A simulated PXRD pattern from the single crystal structure of **2** and (b) a PXRD of the as-synthesized sample.
